# Supplementary material for: Response of Root Development and Nutrient Uptake of Two Chinese Cultivars of Hybrid Rice to N and P Fertilization in Sichuan Province, China
Source: Research Square preprint supplement (doi:10.21203/rs.3.rs-828647/v1), 2021-08-25
Supplement: Supplementary file 1 [file e67b2db358ec147ffaf28018.docx]

**Table S1.** The primer sequences used for qRT-PCR verification

| **Gene ID** | **Function Annotation** | **Forward primer** | **Reverse Primer** |
| --- | --- | --- | --- |
| Os01g0239000 | PHR1 | 5'-CGCAAGGTGAAGGTGGACT-3' | 5'-CGATGTTGTGGCGAGTAG-3' |
| Os07g0614700 | SPX | 5'-CCCATCCAATGACCACC-3' | 5'-TTGAAAGCCAAAACACG-3' |
| Os02g0735200 | OsGS1.1 | 5'-CAAGTCTTTTGGGCGTGATATTGTTGAC-3' | 5'-CACCTGATCACCGGCAGAAATGCCGACA-3' |
| Os03g0223400 | OsGS1.2 | 5'-AAAGGCGTTCGGCCGCGACATCGTGGAC-3' | 5'-CACTTGGTCAGCAGCGGCGATGCCAACT-3' |
